# Supplementary material for: The association between the body roundness index and the risk of rheumatoid arthritis: a cross-sectional study based on NHANES
Source: Research Square preprint supplement (doi:10.21203/rs.3.rs-5339298/v1), 2024-12-16
Supplement: Supplementary file 1 [file 139796a53f7c1205df50bf7e.docx]

| Table S1： Association of Covariates with Rheumatoid Arthritis Risk, Adjusted for All Variables. | | | |
| --- | --- | --- | --- |
| Variables | | OR（95%_CI） | p-Value |
| BRI |  |  |  |
|  | Q1[1.049,3.666] | 1(Ref) |  |
|  | Q2(3.666, 4.924] | 1.22(0.91-1.64) | 0.181 |
|  | Q3(4.924, 6.477] | 1.64(1.25-2.17) | <0.001*** |
|  | Q4(6.477, 20.970] | 2.04(1.55-2.70) | <0.001*** |
| Age(years) | | 1.05(1.04-1.06) | <0.001*** |
| Family Income | |  |  |
|  | PIR<=1.3 | 1(Ref) |  |
|  | (1.3,3.5] | 0.61(0.51-0.73) | <0.001*** |
|  | PIR> 3.5 | 0.65(0.52-0.80) | <0.001*** |
| Marital Status | |  |  |
|  | Living With a partner | 1(Ref) |  |
|  | Living alone | 0.95(0.81-1.11) | 0.503 |
| Education Level(years) | |  |  |
|  | <9 | 1(Ref) |  |
|  | 9-12 | 1.09(0.87-1.36) | 0.472 |
|  | >12 | 1.05(0.85-1.30) | 0.641 |
| Race/Ethnicity | |  |  |
|  | Mexican American | 1(Ref) |  |
|  | Non-Hispanic White | 0.90(0.69-1.18) | 0.441 |
|  | Non-Hispanic Black | 1.42(1.08-1.86) | 0.011* |
|  | Other | 0.88(0.67-1.16) | 0.366 |
| Gender | |  |  |
|  | Female | 1(Ref) |  |
|  | Male | 0.63(0.53-0.74) | <0.001*** |
| Physical Activity | |  |  |
|  | Sedentary | 1(Ref) |  |
|  | Moderate activity | 0.97(0.74-1.27) | 0.812 |
|  | Vigorous activity | 0.83(0.60-1.14) | 0.251 |
|  | Other | 1.04(0.81-1.36) | 0.736 |
| Drinking Status | |  |  |
|  | Non-drinkers | 1(Ref) |  |
|  | Occasional drinkers | 0.95(0.79-1.14) | 0.587 |
|  | Frequent drinkers | 0.92(0.73-1.15) | 0.449 |
| Smoking Status | |  |  |
|  | Never | 1(Ref) |  |
|  | Former | 1.22(1.01-1.48) | 0.036* |
|  | Current | 1.62(1.31-2.00) | <0.001*** |
| Nutrient Consumption | |  |  |
|  | Calorie Consumption(kcal/d) | 1.00(1.00-1.00) | 0.733 |
|  | Protein Consumption (g/d) | 1.00(0.99-1.00) | 0.033* |
|  | Carbohydrate Consumption(g/d) | 1.00(1.00-1.00) | 0.604 |
|  | Fat Consumption (g/d) | 1.00(1.00-1.01) | 0.365 |
|  | Caffeine Consumption (mg/d) | 1.00(1.00-1.00) | 0.007** |
|  | Fibre Consumption (g/d) | 0.99(0.98-1.00) | 0.018* |
| Hyperlipidemia | |  |  |
|  | Normal | 1(Ref) |  |
|  | Hyperlipidemia | 1.18(0.98-1.43) | 0.082 |
| Diabetes | |  |  |
|  | Normal | 1(Ref) |  |
|  | Prediabetes | 1.17(0.89-1.52) | 0.257 |
|  | Diabetes | 1.52(1.25-1.83) | <0.001*** |
| Hypertension | |  |  |
|  | Normal | 1(Ref) |  |
|  | Hypertension | 1.64(1.39-1.93) | <0.001*** |

BRI, Body Roundness Index; PIR ,Poverty Income Ratio; Q, quartiles; OR, odds ratio; CI, confidence interval; Ref: reference; "*" indicates a *P*-value less than 0.05, "**" indicates a *P*-value less than 0.01, and "***" indicates a *P*-value less than 0.001. Adjustments were made for all potential variables, including age, gender, marital status, race/ethnicity, education level, family income, physical activity, drinking status, smoking status, calorie consumption, protein consumption, carbohydrate consumption, fat consumption, caffeine consumption, fibre consumption, hyperlipidemia, diabetes, and hypertension.
